# Supplementary material
Source: publisher figshare collection journal article supplement (https://future-science-group.figshare.com/articles/dataset/_/21316353)
Supplement: Supplementary file 1 [file 1]

**Supplementary Table 1 |** Genes associated with risk scores.

| **Gene** | **Cor** | **p Value** |
| --- | --- | --- |
| ZYX | 0.638 | 6.46E-34 |
| ZWILCH | 0.624 | 3.56E-32 |
| ZSCAN5A | 0.551 | 4.95E-24 |
| ZRANB1 | -0.524 | 1.62E-21 |
| ZNF888 | 0.551 | 4.43E-24 |
| ZNF816 | 0.584 | 1.78E-27 |
| ZNF804A | -0.57 | 5.71E-26 |
| ZNF799 | 0.523 | 1.95E-21 |
| ZNF613 | 0.521 | 2.99E-21 |
| ZNF600 | 0.574 | 2.34E-26 |
| ZNF584 | 0.563 | 3.41E-25 |
| ZNF552 | 0.552 | 4.28E-24 |
| ZNF530 | 0.631 | 4.30E-33 |
| ZNF488 | -0.539 | 7.30E-23 |
| ZNF473 | 0.534 | 2.12E-22 |
| ZNF468 | 0.603 | 1.35E-29 |
| ZNF423 | -0.523 | 2.08E-21 |
| ZNF385C | -0.542 | 3.84E-23 |
| ZNF33A | -0.599 | 3.57E-29 |
| ZNF25 | -0.602 | 1.91E-29 |
| ZNF248 | -0.601 | 2.37E-29 |
| ZNF230 | 0.536 | 1.29E-22 |
| ZNF217 | 0.551 | 4.59E-24 |
| ZNF20 | 0.53 | 5.06E-22 |
| ZMYND11 | -0.724 | 1.28E-47 |
| ZMIZ1 | -0.575 | 1.90E-26 |
| ZDHHC22 | -0.638 | 6.35E-34 |
| ZDHHC18 | 0.531 | 4.24E-22 |
| ZDHHC12 | 0.565 | 1.74E-25 |
| ZCCHC9 | 0.581 | 4.26E-27 |
| ZCCHC24 | -0.599 | 3.62E-29 |
| ZC3HAV1L | 0.65 | 1.54E-35 |
| ZC3H12B | -0.538 | 8.39E-23 |
| ZBTB8OS | 0.554 | 2.41E-24 |
| ZBTB47 | -0.563 | 3.51E-25 |
| ZBTB42 | 0.574 | 2.10E-26 |
| ZBTB18 | -0.574 | 2.40E-26 |
| ZBED6CL | 0.53 | 5.15E-22 |
| ZAR1 | 0.551 | 4.52E-24 |
| YY2 | 0.573 | 2.62E-26 |
| YPEL4 | -0.546 | 1.61E-23 |
| YKT6 | 0.543 | 3.06E-23 |
| YIPF1 | 0.65 | 1.24E-35 |
| XRCC2 | 0.551 | 5.45E-24 |
| XKR8 | 0.658 | 9.52E-37 |
| WNT7B | -0.534 | 1.91E-22 |
| WISP1 | 0.705 | 4.38E-44 |
| WEE1 | 0.699 | 3.88E-43 |
| WDR78 | 0.532 | 3.16E-22 |
| WDR77 | 0.598 | 4.46E-29 |
| WDR62 | 0.624 | 3.69E-32 |
| WDR37 | -0.627 | 1.49E-32 |
| WDR34 | 0.521 | 3.26E-21 |
| WDR1 | 0.555 | 2.20E-24 |
| WDHD1 | 0.535 | 1.69E-22 |
| WDFY3 | -0.525 | 1.24E-21 |
| WBP2 | -0.629 | 9.30E-33 |
| WASF3 | -0.592 | 2.19E-28 |
| WAC | -0.66 | 5.70E-37 |
| VSTM1 | 0.611 | 1.50E-30 |
| VPS51 | -0.534 | 1.94E-22 |
| VMP1 | 0.555 | 1.91E-24 |
| VKORC1 | 0.544 | 2.29E-23 |
| VEGFA | 0.553 | 3.12E-24 |
| VDR | 0.575 | 1.80E-26 |
| VAV3 | 0.699 | 3.90E-43 |
| VASP | 0.551 | 5.19E-24 |
| VASN | 0.7 | 2.69E-43 |
| USP54 | -0.576 | 1.51E-26 |
| USP43 | -0.523 | 2.09E-21 |
| USH1C | -0.54 | 5.61E-23 |
| UPP1 | 0.647 | 3.86E-35 |
| UPF2 | -0.579 | 5.92E-27 |
| UNC79 | -0.529 | 5.90E-22 |
| UNC5A | -0.527 | 9.26E-22 |
| UNC45A | 0.522 | 2.46E-21 |
| ULK4 | 0.624 | 4.12E-32 |
| ULBP3 | 0.758 | 1.80E-54 |
| ULBP1 | 0.616 | 3.21E-31 |
| UGCG | 0.62 | 1.10E-31 |
| UBQLN2 | -0.535 | 1.61E-22 |
| UBL4A | 0.532 | 3.40E-22 |
| UBE2T | 0.589 | 4.75E-28 |
| UBE2S | 0.635 | 1.33E-33 |
| UBE2F | 0.547 | 1.23E-23 |
| UBE2C | 0.53 | 4.54E-22 |
| UBE2A | 0.534 | 2.05E-22 |
| TYMS | 0.561 | 5.60E-25 |
| TYMP | 0.542 | 3.67E-23 |
| TXNDC17 | 0.61 | 1.74E-30 |
| TXLNB | 0.674 | 4.04E-39 |
| TXLNA | 0.54 | 6.15E-23 |
| TWISTNB | 0.558 | 1.09E-24 |
| TWIST1 | 0.56 | 6.07E-25 |
| TWF2 | 0.554 | 2.59E-24 |
| TUBGCP2 | -0.535 | 1.51E-22 |
| TUBG1 | 0.588 | 7.11E-28 |
| TUBB6 | 0.619 | 1.72E-31 |
| TUBA1C | 0.721 | 5.34E-47 |
| TUBA1B | 0.539 | 7.19E-23 |
| TUB | -0.625 | 2.41E-32 |
| TTYH3 | 0.578 | 8.62E-27 |
| TTLL12 | -0.559 | 8.38E-25 |
| TTK | 0.608 | 3.57E-30 |
| TTF2 | 0.606 | 5.11E-30 |
| TTC3 | -0.528 | 7.95E-22 |
| TTC26 | 0.663 | 2.05E-37 |
| TTC12 | 0.589 | 4.63E-28 |
| TSTD1 | 0.616 | 3.19E-31 |
| TSPAN17 | 0.562 | 4.43E-25 |
| TSC1 | -0.521 | 3.15E-21 |
| TRPM8 | 0.596 | 9.35E-29 |
| TRPM4 | 0.551 | 4.57E-24 |
| TROAP | 0.615 | 4.47E-31 |
| TRIP6 | 0.542 | 4.05E-23 |
| TRIP13 | 0.61 | 1.83E-30 |
| TRIM8 | -0.691 | 7.78E-42 |
| TRIM6 | 0.592 | 2.51E-28 |
| TREM1 | 0.56 | 5.78E-25 |
| TRAM1 | 0.589 | 5.44E-28 |
| TRAF5 | 0.61 | 1.99E-30 |
| TRADD | 0.521 | 3.04E-21 |
| TPX2 | 0.556 | 1.51E-24 |
| TPRG1 | 0.588 | 7.48E-28 |
| TPM4 | 0.663 | 2.10E-37 |
| TPM3 | 0.584 | 1.82E-27 |
| TP53I13 | 0.525 | 1.39E-21 |
| TOX | -0.587 | 8.46E-28 |
| TOR3A | 0.531 | 3.78E-22 |
| TOM1L2 | -0.597 | 7.43E-29 |
| TOM1L1 | 0.698 | 7.13E-43 |
| TNRC6C | -0.583 | 2.57E-27 |
| TNR | -0.602 | 1.83E-29 |
| TNK2 | -0.643 | 1.17E-34 |
| TNFSF14 | 0.574 | 2.32E-26 |
| TNFRSF1A | 0.551 | 5.33E-24 |
| TNFRSF19 | 0.549 | 8.32E-24 |
| TNFRSF14 | 0.608 | 3.19E-30 |
| TNFRSF12A | 0.692 | 5.46E-42 |
| TNFRSF11B | 0.754 | 1.71E-53 |
| TNFAIP8 | 0.555 | 2.07E-24 |
| TNFAIP6 | 0.72 | 6.80E-47 |
| TMSB4X | 0.662 | 2.41E-37 |
| TMSB10 | 0.653 | 4.49E-36 |
| TMOD2 | -0.523 | 1.93E-21 |
| TMEM8A | 0.534 | 2.22E-22 |
| TMEM71 | 0.662 | 2.25E-37 |
| TMEM61 | 0.639 | 3.78E-34 |
| TMEM60 | 0.605 | 7.67E-30 |
| TMEM51 | 0.61 | 2.12E-30 |
| TMEM50A | 0.521 | 3.15E-21 |
| TMEM255B | 0.615 | 5.37E-31 |
| TMEM248 | 0.617 | 2.98E-31 |
| TMEM234 | 0.533 | 2.35E-22 |
| TMEM230 | 0.671 | 1.34E-38 |
| TMEM214 | 0.585 | 1.64E-27 |
| TMEM209 | 0.523 | 2.27E-21 |
| TMEM165 | 0.599 | 3.55E-29 |
| TMEM159 | 0.638 | 5.67E-34 |
| TMEM154 | 0.696 | 1.36E-42 |
| TMEM136 | -0.556 | 1.52E-24 |
| TMEM106C | 0.653 | 5.09E-36 |
| TMEM100 | -0.574 | 2.05E-26 |
| TMEFF2 | -0.585 | 1.30E-27 |
| TMED9 | 0.629 | 9.12E-33 |
| TMBIM1 | 0.583 | 2.26E-27 |
| TM9SF3 | -0.546 | 1.54E-23 |
| TK1 | 0.592 | 2.35E-28 |
| TJP2 | -0.555 | 1.94E-24 |
| TIMP1 | 0.744 | 2.06E-51 |
| TIGAR | 0.6 | 2.67E-29 |
| TIFA | 0.557 | 1.40E-24 |
| TICAM2 | 0.566 | 1.66E-25 |
| THRA | -0.68 | 5.14E-40 |
| TGIF1 | 0.65 | 1.18E-35 |
| TGFB2 | 0.538 | 8.06E-23 |
| TFRC | 0.534 | 1.90E-22 |
| TEX26 | 0.542 | 3.99E-23 |
| TET1 | -0.537 | 9.80E-23 |
| TES | 0.561 | 5.25E-25 |
| TENT5B | 0.639 | 4.14E-34 |
| TENT5A | 0.582 | 3.30E-27 |
| TEF | -0.658 | 1.04E-36 |
| TEAD3 | 0.672 | 7.39E-39 |
| TEAD2 | 0.62 | 1.07E-31 |
| TCTEX1D1 | 0.568 | 1.05E-25 |
| TCF23 | 0.583 | 2.18E-27 |
| TCF19 | 0.568 | 9.83E-26 |
| TCEAL2 | -0.58 | 5.15E-27 |
| TCEA3 | 0.672 | 7.52E-39 |
| TBL2 | 0.571 | 4.81E-26 |
| TBC1D31 | 0.551 | 4.95E-24 |
| TBC1D1 | 0.582 | 3.06E-27 |
| TAS2R4 | -0.591 | 2.77E-28 |
| TARSL2 | -0.657 | 1.24E-36 |
| TAPT1 | -0.609 | 2.80E-30 |
| TAGLN2 | 0.783 | 2.14E-60 |
| TAF3 | -0.703 | 8.36E-44 |
| TACC3 | 0.604 | 1.12E-29 |
| TAB1 | -0.537 | 1.17E-22 |
| SYT15 | -0.53 | 4.96E-22 |
| SYDE1 | 0.583 | 2.68E-27 |
| SWAP70 | 0.632 | 3.21E-33 |
| SUSD2 | 0.563 | 3.49E-25 |
| SUPT3H | -0.527 | 9.87E-22 |
| SUMF2 | 0.528 | 7.60E-22 |
| SUFU | -0.63 | 6.17E-33 |
| STK40 | 0.591 | 3.49E-28 |
| STK17A | 0.558 | 8.99E-25 |
| STIL | 0.695 | 2.01E-42 |
| STEAP3 | 0.654 | 4.05E-36 |
| STC1 | 0.548 | 8.95E-24 |
| STBD1 | 0.685 | 8.60E-41 |
| STARD10 | -0.555 | 1.85E-24 |
| STAC | 0.605 | 8.38E-30 |
| ST8SIA4 | 0.541 | 4.85E-23 |
| ST20 | 0.537 | 1.11E-22 |
| SSTR2 | -0.556 | 1.73E-24 |
| SSTR1 | -0.588 | 6.07E-28 |
| SSR3 | 0.542 | 3.94E-23 |
| SRPX2 | 0.609 | 2.65E-30 |
| SRPRA | 0.632 | 3.81E-33 |
| SRGAP3 | -0.538 | 8.86E-23 |
| SQOR | 0.571 | 4.33E-26 |
| SPRY4 | 0.562 | 4.24E-25 |
| SPRY1 | 0.651 | 9.75E-36 |
| SPPL2A | 0.523 | 2.17E-21 |
| SPON2 | 0.621 | 9.89E-32 |
| SPOCD1 | 0.573 | 2.89E-26 |
| SPINK8 | 0.546 | 1.67E-23 |
| SPHKAP | -0.635 | 1.36E-33 |
| SPC24 | 0.578 | 8.16E-27 |
| SPATS2L | 0.596 | 9.52E-29 |
| SPAG4 | 0.639 | 4.56E-34 |
| SP140L | 0.633 | 2.77E-33 |
| SP100 | 0.631 | 4.67E-33 |
| SOX8 | -0.563 | 3.19E-25 |
| SOD3 | 0.568 | 8.56E-26 |
| SOD2 | 0.583 | 2.17E-27 |
| SOCS3 | 0.61 | 1.88E-30 |
| SOCS2 | 0.597 | 5.79E-29 |
| SOCS1 | 0.628 | 1.32E-32 |
| SNRPD2 | 0.549 | 7.24E-24 |
| SNRNP40 | 0.521 | 3.25E-21 |
| SNAP91 | -0.576 | 1.29E-26 |
| SNAI1 | 0.575 | 1.62E-26 |
| SMYD2 | 0.568 | 8.72E-26 |
| SMS | 0.607 | 4.70E-30 |
| SMOC1 | -0.565 | 2.14E-25 |
| SMIM3 | 0.656 | 1.69E-36 |
| SMCO2 | 0.61 | 1.88E-30 |
| SMC4 | 0.662 | 2.66E-37 |
| SMAGP | 0.59 | 4.53E-28 |
| SMAD9 | -0.64 | 2.99E-34 |
| SMAD7 | -0.59 | 3.77E-28 |
| SLITRK5 | -0.648 | 2.32E-35 |
| SLFN12 | 0.531 | 4.05E-22 |
| SLCO1A2 | -0.529 | 5.57E-22 |
| SLC43A3 | 0.715 | 7.23E-46 |
| SLC39A1 | 0.551 | 5.19E-24 |
| SLC35F5 | 0.534 | 1.90E-22 |
| SLC35A2 | 0.664 | 1.26E-37 |
| SLC30A7 | 0.643 | 1.17E-34 |
| SLC30A5 | 0.564 | 2.26E-25 |
| SLC2A9 | 0.524 | 1.75E-21 |
| SLC2A4RG | 0.604 | 9.16E-30 |
| SLC2A10 | 0.616 | 3.47E-31 |
| SLC27A3 | 0.653 | 4.54E-36 |
| SLC26A2 | 0.551 | 4.55E-24 |
| SLC25A48 | -0.587 | 8.92E-28 |
| SLC25A45 | 0.622 | 6.14E-32 |
| SLC25A39 | 0.522 | 2.35E-21 |
| SLC25A28 | -0.559 | 7.23E-25 |
| SLC25A27 | -0.583 | 2.39E-27 |
| SLC25A24 | 0.704 | 4.81E-44 |
| SLC25A19 | 0.547 | 1.22E-23 |
| SLC22A6 | -0.56 | 6.25E-25 |
| SLC22A18 | 0.533 | 2.51E-22 |
| SLC22A17 | -0.54 | 6.25E-23 |
| SLC1A6 | -0.557 | 1.22E-24 |
| SLC1A1 | -0.524 | 1.84E-21 |
| SLC16A9 | -0.569 | 6.92E-26 |
| SLC16A3 | 0.583 | 2.26E-27 |
| SLC12A7 | 0.585 | 1.29E-27 |
| SLC10A3 | 0.585 | 1.60E-27 |
| SKA3 | 0.577 | 1.07E-26 |
| SKA1 | 0.67 | 1.53E-38 |
| SIT1 | 0.538 | 8.39E-23 |
| SIRT1 | -0.608 | 3.75E-30 |
| SIL1 | 0.528 | 7.83E-22 |
| SIK3 | -0.562 | 4.18E-25 |
| SHROOM3 | 0.643 | 1.16E-34 |
| SHQ1 | 0.549 | 7.95E-24 |
| SHOX2 | 0.705 | 3.96E-44 |
| SHISAL2A | 0.636 | 1.13E-33 |
| SHISA7 | -0.587 | 8.99E-28 |
| SHISA5 | 0.565 | 1.82E-25 |
| SHD | -0.56 | 6.88E-25 |
| SHCBP1 | 0.689 | 2.02E-41 |
| SHC1 | 0.603 | 1.43E-29 |
| SHANK2 | -0.534 | 1.92E-22 |
| SH3GL2 | -0.6 | 3.35E-29 |
| SH3BGRL3 | 0.53 | 4.96E-22 |
| SH2D4A | 0.751 | 4.80E-53 |
| SH2D2A | 0.551 | 4.75E-24 |
| SGSM1 | -0.569 | 7.03E-26 |
| SGO2 | 0.635 | 1.47E-33 |
| SGO1 | 0.628 | 1.01E-32 |
| SGMS1 | -0.65 | 1.19E-35 |
| SFRP4 | 0.551 | 4.60E-24 |
| SFRP2 | -0.598 | 4.51E-29 |
| SETD9 | 0.579 | 6.32E-27 |
| SERTAD1 | 0.539 | 7.22E-23 |
| SERPINH1 | 0.679 | 8.23E-40 |
| SERPING1 | 0.634 | 1.67E-33 |
| SERPINF1 | 0.551 | 4.88E-24 |
| SERPINE1 | 0.553 | 2.94E-24 |
| SERPINB8 | 0.639 | 4.02E-34 |
| SERPINB1 | 0.539 | 6.40E-23 |
| SERPINA5 | 0.652 | 7.02E-36 |
| SERPINA3 | 0.592 | 2.27E-28 |
| SERPINA1 | 0.524 | 1.60E-21 |
| SERP2 | -0.527 | 8.98E-22 |
| SERINC5 | -0.527 | 8.50E-22 |
| SERINC2 | 0.534 | 2.28E-22 |
| SEPHS2 | 0.588 | 7.42E-28 |
| SEMA6B | -0.528 | 7.47E-22 |
| SEMA4G | -0.641 | 2.15E-34 |
| SEMA3F | 0.54 | 5.56E-23 |
| SELENON | 0.57 | 6.11E-26 |
| SELENOF | 0.581 | 3.97E-27 |
| SEL1L3 | 0.555 | 1.83E-24 |
| SECTM1 | 0.525 | 1.45E-21 |
| SEC61G | 0.662 | 2.76E-37 |
| SEC61A1 | 0.549 | 8.41E-24 |
| SEC24D | 0.635 | 1.47E-33 |
| SDF4 | 0.646 | 5.16E-35 |
| SDC1 | 0.616 | 3.67E-31 |
| SCRT1 | -0.534 | 2.22E-22 |
| SCNN1B | 0.535 | 1.65E-22 |
| SCG3 | -0.541 | 4.94E-23 |
| SCD | -0.592 | 2.39E-28 |
| SCAPER | -0.622 | 5.73E-32 |
| SATB1 | -0.535 | 1.60E-22 |
| SAMD9 | 0.523 | 2.18E-21 |
| SAMD8 | -0.685 | 9.35E-41 |
| SAMD11 | -0.573 | 2.79E-26 |
| SAA2 | 0.553 | 3.06E-24 |
| SAA1 | 0.728 | 3.02E-48 |
| S100A6 | 0.563 | 3.50E-25 |
| S100A4 | 0.625 | 2.40E-32 |
| S100A11 | 0.605 | 7.26E-30 |
| RUNX1T1 | -0.632 | 3.83E-33 |
| RUNX1 | 0.583 | 2.45E-27 |
| RUNDC3A | -0.547 | 1.21E-23 |
| RUBCNL | 0.62 | 1.15E-31 |
| RTP5 | -0.597 | 5.90E-29 |
| RTN1 | -0.54 | 5.42E-23 |
| RTCA | 0.568 | 1.07E-25 |
| RSPH9 | 0.597 | 7.25E-29 |
| RRM2 | 0.594 | 1.36E-28 |
| RPS6KA5 | -0.588 | 6.90E-28 |
| RPRM | -0.565 | 1.85E-25 |
| RPN2 | 0.592 | 2.18E-28 |
| RPN1 | 0.604 | 9.54E-30 |
| RPL39L | 0.561 | 4.58E-25 |
| RPL3 | -0.526 | 1.18E-21 |
| RPA3 | 0.681 | 3.04E-40 |
| RNFT1 | 0.528 | 8.13E-22 |
| RNF150 | -0.6 | 3.19E-29 |
| RNF135 | 0.586 | 1.08E-27 |
| RMI2 | 0.573 | 2.89E-26 |
| RIPPLY2 | -0.598 | 5.57E-29 |
| RIPK1 | 0.587 | 8.77E-28 |
| RIOK3 | 0.532 | 3.34E-22 |
| RINL | 0.686 | 5.82E-41 |
| RIN1 | 0.544 | 2.25E-23 |
| RICTOR | -0.672 | 9.47E-39 |
| RHOJ | 0.621 | 8.63E-32 |
| RHOD | 0.524 | 1.64E-21 |
| RGS3 | 0.539 | 6.52E-23 |
| RGS22 | 0.636 | 1.01E-33 |
| RGS16 | 0.61 | 2.05E-30 |
| RGR | -0.589 | 5.35E-28 |
| RFTN2 | -0.541 | 4.89E-23 |
| RFC2 | 0.649 | 1.71E-35 |
| REXO2 | 0.651 | 8.70E-36 |
| RER1 | 0.635 | 1.26E-33 |
| REPS2 | -0.628 | 1.15E-32 |
| REEP6 | -0.547 | 1.11E-23 |
| REEP4 | 0.538 | 7.93E-23 |
| RDM1 | 0.677 | 1.57E-39 |
| RDH10 | 0.609 | 2.62E-30 |
| RCAN3 | 0.599 | 4.01E-29 |
| RCAN1 | 0.578 | 9.38E-27 |
| RBSN | -0.58 | 5.28E-27 |
| RBP1 | 0.686 | 6.81E-41 |
| RBMS1 | 0.642 | 1.77E-34 |
| RBM17 | -0.613 | 7.63E-31 |
| RBBP8 | 0.574 | 2.30E-26 |
| RASSF10 | 0.537 | 1.13E-22 |
| RASL10A | -0.632 | 3.41E-33 |
| RARS | 0.577 | 1.18E-26 |
| RARRES2 | 0.645 | 5.92E-35 |
| RARRES1 | 0.568 | 8.86E-26 |
| RAP2B | 0.567 | 1.20E-25 |
| RAP2A | -0.602 | 1.97E-29 |
| RAP1B | 0.621 | 7.90E-32 |
| RAG1 | 0.56 | 6.15E-25 |
| RAD54L | 0.615 | 4.60E-31 |
| RAD54B | 0.679 | 6.90E-40 |
| RAD51AP1 | 0.57 | 5.99E-26 |
| RAD51 | 0.602 | 1.78E-29 |
| RAB5B | -0.602 | 1.78E-29 |
| RAB42 | 0.728 | 2.82E-48 |
| RAB3D | 0.53 | 5.26E-22 |
| RAB38 | 0.597 | 6.46E-29 |
| RAB36 | 0.582 | 3.27E-27 |
| RAB34 | 0.717 | 3.06E-46 |
| RAB32 | 0.617 | 2.55E-31 |
| RAB2A | -0.541 | 4.91E-23 |
| RAB27A | 0.62 | 1.02E-31 |
| RAB18 | -0.647 | 3.26E-35 |
| PYGL | 0.635 | 1.59E-33 |
| PXDNL | 0.613 | 9.13E-31 |
| PUSL1 | 0.566 | 1.45E-25 |
| PTX3 | 0.7 | 3.19E-43 |
| PTTG1 | 0.672 | 9.14E-39 |
| PTPRT | -0.598 | 4.73E-29 |
| PTPN7 | 0.554 | 2.77E-24 |
| PTPN22 | 0.622 | 5.99E-32 |
| PTPN12 | 0.524 | 1.68E-21 |
| PTMA | 0.533 | 2.84E-22 |
| PTGR1 | 0.527 | 9.48E-22 |
| PTGIR | 0.551 | 4.84E-24 |
| PTGFRN | 0.708 | 1.26E-44 |
| PTCRA | 0.538 | 9.41E-23 |
| PSRC1 | 0.624 | 3.28E-32 |
| PSMD8 | 0.581 | 3.98E-27 |
| PSMD12 | 0.541 | 5.02E-23 |
| PSMC4 | 0.553 | 3.49E-24 |
| PSMC2 | 0.649 | 1.71E-35 |
| PSMA7 | 0.527 | 9.65E-22 |
| PSEN2 | 0.532 | 2.99E-22 |
| PRXL2C | 0.595 | 1.09E-28 |
| PRPS2 | 0.559 | 8.09E-25 |
| PRMT6 | 0.581 | 3.88E-27 |
| PRLHR | -0.665 | 9.61E-38 |
| PRKCA | -0.524 | 1.52E-21 |
| PRICKLE3 | 0.742 | 5.67E-51 |
| PRELID2 | 0.544 | 2.62E-23 |
| PRDX4 | 0.523 | 2.00E-21 |
| PRDM11 | -0.531 | 3.69E-22 |
| PRC1 | 0.57 | 6.15E-26 |
| PQLC3 | 0.555 | 2.24E-24 |
| PPP1R3E | -0.556 | 1.63E-24 |
| PPP1R3B | 0.551 | 5.52E-24 |
| PPP1R36 | 0.56 | 6.75E-25 |
| PPP1R15A | 0.567 | 1.13E-25 |
| PPM1M | 0.586 | 1.17E-27 |
| PPM1L | -0.681 | 2.95E-40 |
| PPIC | 0.654 | 3.25E-36 |
| PPIA | 0.569 | 7.29E-26 |
| PPCS | 0.567 | 1.30E-25 |
| POU6F1 | -0.591 | 2.82E-28 |
| POSTN | 0.674 | 4.68E-39 |
| POP4 | 0.567 | 1.22E-25 |
| POLR2L | 0.577 | 1.21E-26 |
| POLR1D | 0.523 | 1.98E-21 |
| POLQ | 0.573 | 2.79E-26 |
| POLL | -0.578 | 8.75E-27 |
| POLE2 | 0.557 | 1.21E-24 |
| POLD3 | 0.531 | 4.05E-22 |
| PODNL1 | 0.599 | 3.57E-29 |
| POC1A | 0.636 | 1.04E-33 |
| PNO1 | 0.529 | 5.51E-22 |
| PNMA1 | -0.532 | 3.47E-22 |
| PMM2 | 0.567 | 1.12E-25 |
| PLSCR1 | 0.634 | 2.01E-33 |
| PLP2 | 0.683 | 1.45E-40 |
| PLOD3 | 0.553 | 3.44E-24 |
| PLOD1 | 0.589 | 5.32E-28 |
| PLK4 | 0.595 | 1.01E-28 |
| PLK3 | 0.583 | 2.55E-27 |
| PLK1 | 0.554 | 2.51E-24 |
| PLIN2 | 0.537 | 1.20E-22 |
| PLEKHA4 | 0.572 | 3.68E-26 |
| PLEK2 | 0.708 | 1.02E-44 |
| PLCB1 | -0.662 | 2.81E-37 |
| PLBD1 | 0.614 | 6.27E-31 |
| PLAUR | 0.633 | 2.24E-33 |
| PLAU | 0.637 | 6.90E-34 |
| PLAT | 0.778 | 3.99E-59 |
| PLA2G6 | -0.604 | 8.85E-30 |
| PLA2G5 | 0.565 | 2.14E-25 |
| PLA2G2A | 0.683 | 1.69E-40 |
| PKIB | 0.65 | 1.27E-35 |
| PKD2 | 0.54 | 5.55E-23 |
| PITX1 | 0.571 | 4.37E-26 |
| PINLYP | 0.758 | 2.11E-54 |
| PIMREG | 0.568 | 9.63E-26 |
| PIK3IP1 | -0.619 | 1.42E-31 |
| PIGT | 0.582 | 3.36E-27 |
| PID1 | -0.614 | 7.24E-31 |
| PI4K2B | 0.586 | 1.10E-27 |
| PHYHIPL | -0.691 | 1.03E-41 |
| PHTF1 | 0.651 | 8.18E-36 |
| PHLDA2 | 0.61 | 1.76E-30 |
| PHETA2 | 0.721 | 5.11E-47 |
| PHACTR3 | -0.589 | 5.84E-28 |
| PGM2 | 0.572 | 3.32E-26 |
| PFN1 | 0.534 | 2.05E-22 |
| PELI2 | -0.617 | 2.63E-31 |
| PEA15 | -0.583 | 2.49E-27 |
| PDZD8 | -0.633 | 2.62E-33 |
| PDRG1 | 0.528 | 7.64E-22 |
| PDPN | 0.723 | 2.27E-47 |
| PDP2 | -0.557 | 1.23E-24 |
| PDLIM7 | 0.549 | 7.47E-24 |
| PDLIM4 | 0.624 | 3.40E-32 |
| PDLIM3 | 0.523 | 2.04E-21 |
| PDLIM1 | 0.654 | 3.53E-36 |
| PDIA6 | 0.561 | 5.46E-25 |
| PDIA5 | 0.596 | 8.66E-29 |
| PDIA4 | 0.669 | 2.64E-38 |
| PDIA3 | 0.605 | 7.36E-30 |
| PDGFA | 0.607 | 4.68E-30 |
| PDE8B | -0.533 | 2.32E-22 |
| PDE2A | -0.568 | 9.10E-26 |
| PDCD4 | -0.568 | 8.66E-26 |
| PDCD1LG2 | 0.531 | 3.71E-22 |
| PCOLCE | 0.641 | 2.23E-34 |
| PCNA | 0.593 | 2.11E-28 |
| PCLAF | 0.609 | 2.52E-30 |
| PCDH7 | -0.57 | 6.22E-26 |
| PCDH15 | -0.587 | 8.85E-28 |
| PCBP3 | -0.634 | 1.77E-33 |
| PC | -0.622 | 6.65E-32 |
| PBLD | -0.538 | 8.49E-23 |
| PBK | 0.534 | 1.88E-22 |
| PAX3 | 0.571 | 4.55E-26 |
| PATZ1 | -0.572 | 3.78E-26 |
| PARPBP | 0.68 | 4.56E-40 |
| PARP9 | 0.552 | 3.70E-24 |
| PARP12 | 0.558 | 1.12E-24 |
| PARD3 | -0.543 | 2.67E-23 |
| PAK5 | -0.539 | 7.64E-23 |
| PABPC5 | -0.596 | 9.63E-29 |
| PABPC4L | 0.526 | 1.13E-21 |
| P4HB | 0.603 | 1.45E-29 |
| P3H2 | 0.587 | 8.77E-28 |
| P3H1 | 0.591 | 2.95E-28 |
| P2RY6 | 0.548 | 8.99E-24 |
| OTUD7A | -0.555 | 2.01E-24 |
| OTP | 0.663 | 1.74E-37 |
| OTOS | 0.54 | 5.92E-23 |
| OSTC | 0.644 | 9.25E-35 |
| OSMR | 0.675 | 3.17E-39 |
| OSBPL10 | 0.645 | 7.32E-35 |
| ORC1 | 0.612 | 1.00E-30 |
| OR51E1 | 0.587 | 9.26E-28 |
| OPHN1 | -0.667 | 4.75E-38 |
| OMP | 0.559 | 7.99E-25 |
| OMG | -0.521 | 3.33E-21 |
| OLFML2A | 0.635 | 1.28E-33 |
| OIP5 | 0.623 | 5.20E-32 |
| OGA | -0.548 | 8.90E-24 |
| ODF3L1 | 0.539 | 7.31E-23 |
| OCIAD2 | 0.712 | 2.28E-45 |
| OAZ1 | 0.539 | 6.92E-23 |
| OAT | -0.525 | 1.41E-21 |
| NUSAP1 | 0.527 | 8.45E-22 |
| NUP37 | 0.58 | 5.78E-27 |
| NUMA1 | -0.562 | 3.78E-25 |
| NUF2 | 0.586 | 1.01E-27 |
| NUDT19 | 0.597 | 5.96E-29 |
| NUCB1 | 0.618 | 2.30E-31 |
| NUAK2 | 0.636 | 1.01E-33 |
| NTNG2 | -0.655 | 2.96E-36 |
| NTAN1 | 0.681 | 3.53E-40 |
| NSUN7 | 0.779 | 2.11E-59 |
| NSUN6 | -0.562 | 4.05E-25 |
| NSG2 | -0.55 | 6.44E-24 |
| NRG3 | -0.611 | 1.45E-30 |
| NRBP1 | 0.536 | 1.38E-22 |
| NR1I2 | 0.532 | 3.03E-22 |
| NPNT | 0.535 | 1.60E-22 |
| NOX4 | 0.637 | 8.48E-34 |
| NOP10 | 0.521 | 3.14E-21 |
| NOG | -0.672 | 7.67E-39 |
| NNMT | 0.71 | 4.34E-45 |
| NMT2 | -0.558 | 1.11E-24 |
| NLGN2 | -0.544 | 2.29E-23 |
| NKX2-5 | 0.705 | 4.06E-44 |
| NFKBIZ | 0.528 | 7.94E-22 |
| NFE2L3 | 0.604 | 1.07E-29 |
| NF1 | -0.528 | 8.06E-22 |
| NET1 | -0.624 | 3.27E-32 |
| NEMP1 | 0.553 | 3.32E-24 |
| NEK6 | 0.577 | 9.99E-27 |
| NEK2 | 0.657 | 1.23E-36 |
| NEIL3 | 0.648 | 2.39E-35 |
| NECTIN2 | 0.538 | 9.06E-23 |
| NDRG3 | -0.578 | 9.47E-27 |
| NDRG2 | -0.675 | 3.42E-39 |
| NDE1 | 0.563 | 3.08E-25 |
| NDC80 | 0.627 | 1.66E-32 |
| NDC1 | 0.609 | 2.62E-30 |
| NCF1 | 0.525 | 1.38E-21 |
| NCAPH | 0.563 | 3.31E-25 |
| NCAPG2 | 0.544 | 2.50E-23 |
| NCAPG | 0.639 | 4.44E-34 |
| NBR1 | -0.532 | 3.10E-22 |
| NAT1 | 0.535 | 1.81E-22 |
| NAP1L3 | -0.633 | 2.41E-33 |
| NANP | 0.562 | 4.13E-25 |
| NAMPT | 0.636 | 1.12E-33 |
| NALCN | -0.663 | 2.00E-37 |
| MYZAP | 0.537 | 1.09E-22 |
| MYOF | 0.536 | 1.44E-22 |
| MYL6 | 0.539 | 7.24E-23 |
| MYL12B | 0.598 | 5.44E-29 |
| MYL12A | 0.697 | 7.46E-43 |
| MYDGF | 0.568 | 8.79E-26 |
| MYD88 | 0.521 | 3.42E-21 |
| MYCBPAP | 0.521 | 3.39E-21 |
| MYCBP | 0.564 | 2.26E-25 |
| MYBPH | 0.674 | 4.34E-39 |
| MYBL2 | 0.57 | 5.62E-26 |
| MXRA7 | 0.574 | 2.46E-26 |
| MXRA5 | 0.526 | 1.18E-21 |
| MXI1 | -0.68 | 5.59E-40 |
| MUM1 | -0.532 | 2.85E-22 |
| MUL1 | 0.535 | 1.72E-22 |
| MTSS1L | -0.571 | 4.31E-26 |
| MTPAP | -0.552 | 4.17E-24 |
| MTMR3 | -0.605 | 7.05E-30 |
| MTMR11 | 0.545 | 1.77E-23 |
| MTFR2 | 0.577 | 1.12E-26 |
| MTFR1 | 0.521 | 3.07E-21 |
| MTAP | -0.58 | 4.75E-27 |
| MSRB2 | -0.535 | 1.52E-22 |
| MSR1 | 0.561 | 4.46E-25 |
| MSN | 0.704 | 4.81E-44 |
| MRVI1 | -0.522 | 2.30E-21 |
| MRPS15 | 0.599 | 3.55E-29 |
| MRPS12 | 0.573 | 2.69E-26 |
| MRPL37 | 0.527 | 8.81E-22 |
| MRPL32 | 0.569 | 7.30E-26 |
| MRPL22 | 0.523 | 2.27E-21 |
| MRM2 | 0.598 | 4.59E-29 |
| MRGBP | 0.611 | 1.40E-30 |
| MRC2 | 0.638 | 5.02E-34 |
| MPZL3 | 0.629 | 7.32E-33 |
| MOXD1 | 0.589 | 4.85E-28 |
| MORN4 | -0.542 | 3.98E-23 |
| MORN3 | 0.539 | 7.13E-23 |
| MOCOS | 0.598 | 4.66E-29 |
| MND1 | 0.631 | 4.50E-33 |
| MN1 | -0.69 | 1.40E-41 |
| MMS19 | -0.587 | 8.49E-28 |
| MMP9 | 0.589 | 5.27E-28 |
| MMP14 | 0.554 | 2.36E-24 |
| MMP11 | 0.64 | 2.81E-34 |
| MLX | 0.527 | 8.79E-22 |
| MLLT6 | -0.562 | 3.55E-25 |
| MKX | -0.545 | 1.80E-23 |
| MIPOL1 | -0.573 | 3.17E-26 |
| MIPEP | 0.558 | 1.10E-24 |
| MINDY3 | -0.522 | 2.62E-21 |
| MICU1 | -0.625 | 2.92E-32 |
| MGME1 | 0.576 | 1.25E-26 |
| MGAT4C | -0.65 | 1.16E-35 |
| MGAT4B | 0.641 | 2.27E-34 |
| MGARP | 0.541 | 4.92E-23 |
| MFAP2 | 0.56 | 6.96E-25 |
| METTL7B | 0.67 | 1.87E-38 |
| MEOX2 | 0.68 | 5.31E-40 |
| MELK | 0.631 | 5.17E-33 |
| MEGF11 | -0.54 | 5.26E-23 |
| MED8 | 0.589 | 5.03E-28 |
| MDK | 0.536 | 1.28E-22 |
| MDGA2 | -0.597 | 7.42E-29 |
| MCUB | 0.745 | 1.27E-51 |
| MCM8 | 0.534 | 1.92E-22 |
| MCM2 | 0.582 | 2.85E-27 |
| MCAM | 0.613 | 9.05E-31 |
| MBOAT2 | -0.526 | 1.09E-21 |
| MBNL3 | 0.562 | 4.04E-25 |
| MBD2 | 0.543 | 2.93E-23 |
| MB21D2 | -0.524 | 1.57E-21 |
| MARVELD1 | 0.652 | 7.73E-36 |
| MARF1 | -0.575 | 1.79E-26 |
| MAPT | -0.589 | 5.53E-28 |
| MAPK8 | -0.605 | 7.29E-30 |
| MAP3K7CL | 0.635 | 1.45E-33 |
| MAP3K5 | -0.561 | 4.62E-25 |
| MAP3K20 | 0.588 | 6.79E-28 |
| MAP2K3 | 0.683 | 1.99E-40 |
| MAP1LC3C | 0.707 | 1.59E-44 |
| MANF | 0.525 | 1.40E-21 |
| MALSU1 | 0.578 | 8.39E-27 |
| MAGOH | 0.552 | 3.54E-24 |
| MAEL | 0.601 | 2.20E-29 |
| MAD2L1 | 0.562 | 3.87E-25 |
| MACC1 | 0.558 | 1.04E-24 |
| LYPLA1 | 0.595 | 1.16E-28 |
| LXN | 0.578 | 8.87E-27 |
| LUZP2 | -0.548 | 8.72E-24 |
| LUM | 0.59 | 4.44E-28 |
| LTF | 0.712 | 2.70E-45 |
| LTBR | 0.526 | 1.10E-21 |
| LSP1 | 0.637 | 8.91E-34 |
| LSM4 | 0.536 | 1.31E-22 |
| LSM10 | 0.556 | 1.70E-24 |
| LRRTM4 | -0.545 | 2.05E-23 |
| LRRFIP1 | 0.572 | 3.65E-26 |
| LRRC8A | -0.605 | 6.71E-30 |
| LRRC75A | 0.541 | 4.41E-23 |
| LRRC42 | 0.537 | 1.17E-22 |
| LRRC36 | 0.599 | 3.80E-29 |
| LRRC1 | -0.568 | 8.81E-26 |
| LRR1 | 0.584 | 1.83E-27 |
| LRP1B | -0.522 | 2.52E-21 |
| LRIT2 | -0.617 | 2.46E-31 |
| LRIG1 | -0.566 | 1.72E-25 |
| LRGUK | 0.532 | 2.85E-22 |
| LOXL4 | 0.564 | 2.46E-25 |
| LOXL2 | 0.535 | 1.56E-22 |
| LOXL1 | 0.707 | 1.46E-44 |
| LOX | 0.636 | 1.11E-33 |
| LMNA | 0.528 | 7.59E-22 |
| LMAN2 | 0.581 | 4.13E-27 |
| LIF | 0.624 | 3.97E-32 |
| LGALS8 | 0.581 | 4.21E-27 |
| LGALS3 | 0.632 | 3.21E-33 |
| LGALS1 | 0.638 | 5.65E-34 |
| LENG9 | 0.566 | 1.66E-25 |
| LDHD | -0.53 | 5.31E-22 |
| LDHB | -0.556 | 1.51E-24 |
| LDHA | 0.614 | 6.30E-31 |
| LCTL | 0.708 | 1.20E-44 |
| LATS2 | 0.632 | 3.38E-33 |
| LARP4B | -0.547 | 1.21E-23 |
| LAP3 | 0.548 | 9.81E-24 |
| LAMTOR2 | 0.527 | 9.79E-22 |
| LAMC1 | 0.646 | 4.47E-35 |
| LAMB4 | 0.549 | 7.04E-24 |
| LAMB1 | 0.545 | 1.90E-23 |
| LAMA2 | 0.556 | 1.77E-24 |
| KYAT1 | -0.59 | 3.97E-28 |
| KTI12 | 0.594 | 1.61E-28 |
| KSR2 | -0.528 | 7.53E-22 |
| KRT7 | 0.539 | 7.41E-23 |
| KPNA5 | -0.525 | 1.25E-21 |
| KPNA2 | 0.668 | 3.71E-38 |
| KMT5A | 0.593 | 1.88E-28 |
| KMO | 0.611 | 1.61E-30 |
| KLHL32 | -0.551 | 5.13E-24 |
| KLHDC8A | 0.538 | 8.35E-23 |
| KLHDC1 | -0.57 | 6.17E-26 |
| KLF17 | 0.526 | 1.23E-21 |
| KIF9 | 0.553 | 3.45E-24 |
| KIF4A | 0.675 | 3.28E-39 |
| KIF2C | 0.651 | 9.44E-36 |
| KIF23 | 0.68 | 5.70E-40 |
| KIF21B | -0.58 | 4.55E-27 |
| KIF20A | 0.647 | 3.99E-35 |
| KIF1BP | -0.699 | 3.47E-43 |
| KIF18A | 0.687 | 4.45E-41 |
| KIF14 | 0.6 | 2.81E-29 |
| KIF13A | -0.56 | 6.24E-25 |
| KIAA2026 | -0.537 | 1.10E-22 |
| KIAA1755 | -0.534 | 2.05E-22 |
| KIAA0040 | 0.695 | 2.10E-42 |
| KHNYN | 0.589 | 4.63E-28 |
| KHDRBS2 | -0.539 | 7.03E-23 |
| KDELR3 | 0.654 | 3.50E-36 |
| KDELR2 | 0.679 | 6.12E-40 |
| KDELR1 | 0.649 | 1.91E-35 |
| KDELC2 | 0.633 | 2.91E-33 |
| KCTD14 | 0.615 | 4.77E-31 |
| KCNIP3 | -0.625 | 2.84E-32 |
| KCNIP2 | -0.534 | 2.12E-22 |
| KCNE4 | 0.569 | 7.81E-26 |
| KCNE3 | 0.545 | 1.95E-23 |
| KCNB1 | -0.687 | 3.56E-41 |
| KATNAL2 | 0.545 | 1.85E-23 |
| KAT6B | -0.632 | 3.10E-33 |
| JPH4 | -0.542 | 3.71E-23 |
| JPH3 | -0.614 | 6.48E-31 |
| JMY | -0.557 | 1.38E-24 |
| JHY | 0.688 | 3.03E-41 |
| JAG1 | 0.55 | 6.19E-24 |
| ITPRIPL1 | 0.601 | 2.53E-29 |
| ITPKC | 0.553 | 3.03E-24 |
| ITPK1 | -0.569 | 7.00E-26 |
| ITGB3BP | 0.581 | 4.27E-27 |
| ITGB3 | 0.614 | 6.58E-31 |
| ITGA7 | 0.569 | 7.57E-26 |
| ITGA5 | 0.62 | 1.30E-31 |
| ITGA4 | 0.529 | 5.86E-22 |
| ITGA3 | 0.564 | 2.60E-25 |
| ISYNA1 | 0.524 | 1.58E-21 |
| ISL2 | 0.643 | 1.16E-34 |
| ISG20 | 0.621 | 8.37E-32 |
| IRX5 | 0.527 | 9.87E-22 |
| IRF1 | 0.525 | 1.41E-21 |
| IRAK4 | 0.574 | 2.14E-26 |
| IQGAP3 | 0.612 | 1.12E-30 |
| IQGAP2 | 0.554 | 2.50E-24 |
| IQGAP1 | 0.599 | 3.96E-29 |
| INA | -0.521 | 3.00E-21 |
| IMMT | 0.548 | 9.62E-24 |
| IL7 | 0.564 | 2.74E-25 |
| IL1RAP | 0.626 | 1.77E-32 |
| IL13RA2 | 0.658 | 1.03E-36 |
| IKZF5 | -0.633 | 2.50E-33 |
| IKBIP | 0.68 | 5.73E-40 |
| IGIP | -0.641 | 2.20E-34 |
| IGFBP2 | 0.78 | 1.68E-59 |
| IGF2BP3 | 0.709 | 8.56E-45 |
| IGF2BP2 | 0.727 | 3.54E-48 |
| IGF1R | -0.57 | 5.77E-26 |
| IFT57 | 0.562 | 3.63E-25 |
| IFT22 | 0.577 | 1.13E-26 |
| IFT122 | 0.536 | 1.33E-22 |
| IFNGR2 | 0.705 | 4.79E-44 |
| IFITM10 | -0.61 | 1.86E-30 |
| IFI30 | 0.551 | 5.42E-24 |
| IDI1 | -0.545 | 1.93E-23 |
| IBSP | 0.588 | 7.20E-28 |
| HUS1 | 0.544 | 2.20E-23 |
| HTRA3 | 0.627 | 1.54E-32 |
| HSPG2 | 0.527 | 9.94E-22 |
| HSPB7 | 0.552 | 4.34E-24 |
| HSPB11 | 0.535 | 1.52E-22 |
| HSPB1 | 0.53 | 4.49E-22 |
| HSPA5 | 0.572 | 3.66E-26 |
| HSP90B1 | 0.578 | 8.93E-27 |
| HSD3B7 | 0.567 | 1.25E-25 |
| HS3ST3B1 | 0.614 | 5.83E-31 |
| HS2ST1 | 0.564 | 2.27E-25 |
| HPSE2 | -0.629 | 7.49E-33 |
| HP | 0.581 | 4.49E-27 |
| HOXD9 | 0.645 | 5.66E-35 |
| HOXD13 | 0.641 | 1.96E-34 |
| HOXD11 | 0.685 | 7.76E-41 |
| HOXD10 | 0.699 | 3.77E-43 |
| HOXC9 | 0.727 | 4.44E-48 |
| HOXC8 | 0.722 | 4.34E-47 |
| HOXC6 | 0.678 | 1.22E-39 |
| HOXC4 | 0.653 | 4.92E-36 |
| HOXC13 | 0.609 | 2.57E-30 |
| HOXC11 | 0.649 | 1.90E-35 |
| HOXC10 | 0.734 | 2.01E-49 |
| HOXB4 | 0.537 | 1.01E-22 |
| HOXB3 | 0.648 | 2.18E-35 |
| HOXB2 | 0.586 | 1.14E-27 |
| HOXA7 | 0.618 | 1.91E-31 |
| HOXA6 | 0.636 | 9.87E-34 |
| HOXA5 | 0.706 | 2.30E-44 |
| HOXA4 | 0.595 | 1.04E-28 |
| HOXA3 | 0.642 | 1.74E-34 |
| HOXA2 | 0.619 | 1.55E-31 |
| HOXA10 | 0.589 | 5.36E-28 |
| HOXA1 | 0.622 | 7.38E-32 |
| HORMAD2 | 0.53 | 4.72E-22 |
| HNRNPUL2 | -0.542 | 3.88E-23 |
| HNRNPH3 | -0.55 | 6.38E-24 |
| HMX1 | -0.592 | 2.38E-28 |
| HMMR | 0.562 | 3.69E-25 |
| HMGN5 | -0.597 | 5.94E-29 |
| HLF | -0.547 | 1.32E-23 |
| HJURP | 0.622 | 5.84E-32 |
| HIST1H3G | 0.615 | 4.98E-31 |
| HIST1H2BJ | 0.614 | 7.18E-31 |
| HIST1H2BH | 0.689 | 1.63E-41 |
| HIPK2 | -0.55 | 6.07E-24 |
| HIF1AN | -0.543 | 3.04E-23 |
| HFE | 0.687 | 4.67E-41 |
| HEXB | 0.645 | 6.81E-35 |
| HEBP2 | 0.58 | 5.40E-27 |
| HDHD3 | 0.534 | 2.03E-22 |
| HDAC5 | -0.562 | 3.68E-25 |
| HDAC4 | -0.658 | 9.08E-37 |
| HDAC3 | 0.587 | 8.23E-28 |
| HCCS | 0.534 | 2.19E-22 |
| HASPIN | 0.587 | 9.07E-28 |
| H2AFY2 | -0.564 | 2.45E-25 |
| GUSB | 0.607 | 4.13E-30 |
| GUCY2C | 0.557 | 1.37E-24 |
| GTSE1 | 0.567 | 1.29E-25 |
| GTPBP1 | -0.544 | 2.50E-23 |
| GTF2E2 | 0.53 | 4.42E-22 |
| GSX2 | 0.529 | 6.38E-22 |
| GSTK1 | 0.591 | 2.88E-28 |
| GSS | 0.544 | 2.17E-23 |
| GSDMD | 0.566 | 1.38E-25 |
| GSAP | 0.669 | 2.63E-38 |
| GRWD1 | 0.543 | 3.02E-23 |
| GRIK4 | -0.542 | 3.74E-23 |
| GRID1 | -0.537 | 1.07E-22 |
| GRIA4 | -0.599 | 4.05E-29 |
| GRIA2 | -0.532 | 3.06E-22 |
| GRB14 | 0.619 | 1.46E-31 |
| GRAMD1B | -0.6 | 2.99E-29 |
| GPX8 | 0.757 | 2.55E-54 |
| GPX7 | 0.598 | 4.64E-29 |
| GPR65 | 0.538 | 9.67E-23 |
| GPR3 | 0.569 | 6.98E-26 |
| GPR173 | -0.525 | 1.48E-21 |
| GPR158 | -0.548 | 8.98E-24 |
| GPR157 | 0.611 | 1.59E-30 |
| GPR156 | 0.6 | 3.22E-29 |
| GPNMB | 0.532 | 3.11E-22 |
| GPN1 | 0.522 | 2.68E-21 |
| GON7 | 0.557 | 1.32E-24 |
| GNS | 0.539 | 7.46E-23 |
| GNG5 | 0.549 | 8.69E-24 |
| GNG12 | 0.571 | 4.84E-26 |
| GNAL | -0.567 | 1.10E-25 |
| GNAI1 | -0.528 | 6.84E-22 |
| GLUD1 | -0.67 | 1.54E-38 |
| GLRX | 0.556 | 1.76E-24 |
| GLMP | 0.59 | 3.98E-28 |
| GLB1 | 0.597 | 6.19E-29 |
| GLA | 0.697 | 9.93E-43 |
| GJC1 | 0.661 | 3.23E-37 |
| GINS4 | 0.615 | 5.09E-31 |
| GINS2 | 0.6 | 2.62E-29 |
| GINS1 | 0.556 | 1.75E-24 |
| GGH | 0.655 | 2.40E-36 |
| GGACT | 0.613 | 8.20E-31 |
| GFRA1 | -0.565 | 1.97E-25 |
| GEMIN7 | 0.57 | 6.34E-26 |
| GDF15 | 0.707 | 1.87E-44 |
| GDF10 | -0.535 | 1.52E-22 |
| GDAP1L1 | -0.567 | 1.35E-25 |
| GCLC | -0.558 | 9.12E-25 |
| GBP1 | 0.551 | 5.20E-24 |
| GBF1 | -0.557 | 1.17E-24 |
| GAS2L3 | 0.774 | 3.52E-58 |
| GAPDH | 0.548 | 1.05E-23 |
| GALNT5 | 0.527 | 9.43E-22 |
| GALNT3 | 0.63 | 6.76E-33 |
| GALNT2 | 0.552 | 4.35E-24 |
| GALNT13 | -0.705 | 3.38E-44 |
| GALNT12 | 0.537 | 1.21E-22 |
| GALNS | 0.536 | 1.38E-22 |
| GALE | 0.528 | 6.73E-22 |
| GADD45A | 0.554 | 2.39E-24 |
| GABRB3 | -0.55 | 5.99E-24 |
| GABBR1 | -0.661 | 3.25E-37 |
| G0S2 | 0.653 | 5.41E-36 |
| FZD6 | 0.613 | 7.70E-31 |
| FUT9 | -0.608 | 3.51E-30 |
| FUCA2 | 0.538 | 8.49E-23 |
| FSTL5 | -0.542 | 3.62E-23 |
| FSTL1 | 0.726 | 7.64E-48 |
| FRY | -0.679 | 7.72E-40 |
| FRRS1 | 0.601 | 2.29E-29 |
| FRMD8 | 0.531 | 3.90E-22 |
| FREM2 | 0.541 | 4.73E-23 |
| FRA10AC1 | -0.719 | 1.15E-46 |
| FPGT | 0.598 | 4.81E-29 |
| FOXO4 | -0.579 | 7.30E-27 |
| FOXM1 | 0.561 | 4.52E-25 |
| FOSL1 | 0.539 | 7.17E-23 |
| FNDC3B | 0.686 | 6.09E-41 |
| FNDC11 | 0.532 | 3.00E-22 |
| FN1 | 0.533 | 2.74E-22 |
| FMOD | 0.698 | 6.96E-43 |
| FLRT1 | -0.609 | 2.79E-30 |
| FLOT2 | 0.57 | 5.51E-26 |
| FLNC | 0.581 | 4.49E-27 |
| FLNA | 0.522 | 2.43E-21 |
| FKBP9 | 0.714 | 9.35E-46 |
| FKBP1C | 0.535 | 1.76E-22 |
| FKBP1A | 0.587 | 7.79E-28 |
| FKBP10 | 0.535 | 1.53E-22 |
| FHL3 | 0.554 | 2.61E-24 |
| FGFRL1 | 0.568 | 1.07E-25 |
| FGF12 | -0.531 | 4.27E-22 |
| FES | 0.526 | 1.20E-21 |
| FERMT1 | -0.623 | 4.59E-32 |
| FCHSD2 | -0.62 | 1.22E-31 |
| FCHSD1 | 0.623 | 4.39E-32 |
| FCGR2B | 0.536 | 1.43E-22 |
| FBXW9 | 0.521 | 3.38E-21 |
| FBXW4 | -0.565 | 1.81E-25 |
| FBXO39 | 0.594 | 1.37E-28 |
| FBXO25 | -0.527 | 9.75E-22 |
| FBXO17 | 0.685 | 8.04E-41 |
| FBLN7 | 0.605 | 7.73E-30 |
| FBLN5 | 0.522 | 2.69E-21 |
| FBLIM1 | 0.576 | 1.55E-26 |
| FAS | 0.531 | 3.84E-22 |
| FANCI | 0.594 | 1.50E-28 |
| FANCC | 0.524 | 1.85E-21 |
| FANCB | 0.566 | 1.60E-25 |
| FANCA | 0.555 | 1.91E-24 |
| FAM83G | 0.537 | 1.08E-22 |
| FAM83D | 0.645 | 6.26E-35 |
| FAM72B | 0.638 | 5.33E-34 |
| FAM72A | 0.598 | 5.47E-29 |
| FAM57B | -0.568 | 9.18E-26 |
| FAM3C | 0.537 | 1.05E-22 |
| FAM222A | -0.592 | 2.69E-28 |
| FAM221A | 0.532 | 3.11E-22 |
| FAM20C | 0.643 | 1.22E-34 |
| FAM19A3 | 0.623 | 4.42E-32 |
| FAM192A | -0.58 | 5.38E-27 |
| FAM183A | 0.548 | 1.02E-23 |
| FAM171A1 | -0.6 | 3.09E-29 |
| FAM167A | -0.528 | 7.83E-22 |
| FAM155A | -0.654 | 3.25E-36 |
| FAM149B1 | -0.608 | 3.64E-30 |
| FAM13C | -0.71 | 5.40E-45 |
| FAM136A | 0.563 | 2.92E-25 |
| FAM133A | -0.738 | 2.45E-50 |
| FAM129A | 0.632 | 3.15E-33 |
| FAM126A | 0.612 | 1.24E-30 |
| FAM120AOS | 0.558 | 9.78E-25 |
| FAM114A1 | 0.708 | 1.27E-44 |
| FAM111B | 0.555 | 2.02E-24 |
| FAM111A | 0.539 | 7.14E-23 |
| FAM110B | -0.645 | 6.38E-35 |
| FAIM2 | -0.539 | 7.37E-23 |
| FABP5 | 0.711 | 3.94E-45 |
| FAAP24 | 0.653 | 5.87E-36 |
| F2RL2 | 0.537 | 1.19E-22 |
| F11R | 0.606 | 5.48E-30 |
| EZH1 | -0.592 | 2.60E-28 |
| EYA4 | 0.579 | 6.33E-27 |
| EXO1 | 0.617 | 3.06E-31 |
| EVC2 | 0.695 | 1.75E-42 |
| EVC | 0.584 | 1.85E-27 |
| EVA1C | 0.587 | 8.24E-28 |
| EVA1B | 0.648 | 2.59E-35 |
| ETV7 | 0.631 | 4.04E-33 |
| ETV6 | 0.529 | 5.44E-22 |
| ETF1 | 0.523 | 2.26E-21 |
| ESYT1 | 0.582 | 3.11E-27 |
| ESPL1 | 0.593 | 1.86E-28 |
| ESM1 | 0.556 | 1.75E-24 |
| ESCO2 | 0.567 | 1.27E-25 |
| ERP44 | 0.542 | 3.60E-23 |
| ERP27 | 0.547 | 1.13E-23 |
| ERI1 | 0.63 | 7.12E-33 |
| ERGIC1 | 0.569 | 7.39E-26 |
| ERCC6L | 0.637 | 8.32E-34 |
| EPOP | -0.569 | 8.46E-26 |
| EPHB2 | 0.532 | 3.45E-22 |
| EPHA2 | 0.542 | 3.45E-23 |
| EPC1 | -0.556 | 1.62E-24 |
| EOGT | 0.583 | 2.15E-27 |
| ENPP1 | 0.595 | 1.09E-28 |
| ENPEP | 0.588 | 6.89E-28 |
| ENO4 | 0.527 | 8.73E-22 |
| ENHO | -0.526 | 1.18E-21 |
| EN1 | 0.774 | 5.32E-58 |
| EMP3 | 0.767 | 2.19E-56 |
| EMILIN3 | 0.606 | 5.72E-30 |
| EMILIN2 | 0.704 | 6.10E-44 |
| EMILIN1 | 0.622 | 7.11E-32 |
| ELFN2 | -0.598 | 5.66E-29 |
| ELF4 | 0.537 | 1.19E-22 |
| EIF4ENIF1 | -0.547 | 1.30E-23 |
| EIF4EBP2 | -0.521 | 3.11E-21 |
| EID3 | 0.597 | 6.34E-29 |
| EHD4 | 0.543 | 2.85E-23 |
| EHD2 | 0.535 | 1.55E-22 |
| EFNB2 | 0.548 | 1.00E-23 |
| EFNB1 | 0.568 | 1.00E-25 |
| EFEMP2 | 0.686 | 6.23E-41 |
| EEF1AKMT2 | -0.543 | 2.95E-23 |
| EDEM2 | 0.619 | 1.67E-31 |
| ECT2 | 0.649 | 1.74E-35 |
| ECHDC2 | 0.584 | 2.04E-27 |
| E2F8 | 0.659 | 6.66E-37 |
| E2F7 | 0.704 | 6.11E-44 |
| DYRK3 | 0.621 | 7.99E-32 |
| DYNLT3 | 0.526 | 1.23E-21 |
| DUSP26 | -0.64 | 3.00E-34 |
| DUSP10 | 0.564 | 2.27E-25 |
| DTYMK | 0.569 | 8.24E-26 |
| DTX2 | 0.539 | 7.04E-23 |
| DSN1 | 0.626 | 1.95E-32 |
| DSG2 | 0.564 | 2.77E-25 |
| DSCAML1 | -0.625 | 3.01E-32 |
| DRC1 | 0.564 | 2.46E-25 |
| DPYD | 0.653 | 5.09E-36 |
| DPY19L1 | 0.624 | 4.12E-32 |
| DPP4 | 0.601 | 2.02E-29 |
| DPEP1 | 0.525 | 1.26E-21 |
| DPAGT1 | 0.554 | 2.31E-24 |
| DNM3 | -0.634 | 2.15E-33 |
| DNAJC25 | 0.531 | 4.18E-22 |
| DNAJC22 | 0.604 | 1.00E-29 |
| DNAJC12 | -0.658 | 8.42E-37 |
| DNAJB12 | -0.64 | 3.12E-34 |
| DNAJB11 | 0.545 | 1.86E-23 |
| DNAH9 | 0.581 | 4.24E-27 |
| DNAH11 | 0.542 | 3.74E-23 |
| DNAAF5 | 0.562 | 4.17E-25 |
| DMRTA2 | 0.691 | 7.91E-42 |
| DLL1 | -0.536 | 1.26E-22 |
| DLGAP5 | 0.666 | 6.94E-38 |
| DISP3 | -0.601 | 2.00E-29 |
| DIRAS3 | 0.673 | 5.66E-39 |
| DIP2C | -0.559 | 8.86E-25 |
| DIAPH3 | 0.556 | 1.66E-24 |
| DHTKD1 | -0.571 | 4.23E-26 |
| DHRS13 | 0.538 | 9.13E-23 |
| DHDDS | 0.537 | 1.07E-22 |
| DGCR2 | -0.578 | 9.36E-27 |
| DESI2 | 0.523 | 2.17E-21 |
| DESI1 | -0.627 | 1.71E-32 |
| DES | 0.563 | 2.99E-25 |
| DEPDC1B | 0.619 | 1.79E-31 |
| DEPDC1 | 0.734 | 2.06E-49 |
| DENR | 0.527 | 8.26E-22 |
| DENND2D | 0.599 | 3.61E-29 |
| DEDD2 | 0.618 | 1.86E-31 |
| DDOST | 0.604 | 9.21E-30 |
| DDIT4L | 0.552 | 3.72E-24 |
| DDIAS | 0.631 | 4.21E-33 |
| DCTD | 0.565 | 2.16E-25 |
| DCAF11 | -0.55 | 6.40E-24 |
| DAP | 0.623 | 5.58E-32 |
| CYTH1 | -0.572 | 3.32E-26 |
| CYP17A1 | -0.627 | 1.42E-32 |
| CXCL9 | 0.551 | 4.87E-24 |
| CXCL11 | 0.553 | 3.27E-24 |
| CXCL10 | 0.65 | 1.53E-35 |
| CUX2 | -0.532 | 3.38E-22 |
| CUL7 | 0.605 | 6.99E-30 |
| CTSA | 0.563 | 3.32E-25 |
| CTNNA1 | 0.542 | 3.36E-23 |
| CTIF | -0.622 | 6.73E-32 |
| CTHRC1 | 0.633 | 2.98E-33 |
| CTF1 | 0.542 | 3.51E-23 |
| CSTF2T | -0.593 | 1.68E-28 |
| CSTA | 0.541 | 4.58E-23 |
| CSMD3 | -0.685 | 8.37E-41 |
| CSDC2 | -0.626 | 2.35E-32 |
| CRYBG1 | 0.585 | 1.65E-27 |
| CRY2 | -0.67 | 1.59E-38 |
| CRTC1 | -0.579 | 5.84E-27 |
| CRTAC1 | -0.72 | 9.01E-47 |
| CPQ | 0.562 | 4.21E-25 |
| CPEB3 | -0.63 | 6.10E-33 |
| CPA4 | 0.537 | 1.17E-22 |
| COX15 | -0.595 | 1.15E-28 |
| COMMD7 | 0.579 | 6.20E-27 |
| COLGALT1 | 0.605 | 7.66E-30 |
| COL8A1 | 0.653 | 4.39E-36 |
| COL6A2 | 0.671 | 1.03E-38 |
| COL5A2 | 0.714 | 1.17E-45 |
| COL5A1 | 0.664 | 1.43E-37 |
| COL4A2 | 0.643 | 1.15E-34 |
| COL4A1 | 0.635 | 1.28E-33 |
| COL3A1 | 0.578 | 8.95E-27 |
| COL1A2 | 0.604 | 1.11E-29 |
| COL1A1 | 0.584 | 1.91E-27 |
| CNTNAP3B | 0.528 | 7.76E-22 |
| CNNM2 | -0.662 | 3.01E-37 |
| CNIH4 | 0.639 | 4.70E-34 |
| CMYA5 | 0.594 | 1.27E-28 |
| CMTM6 | 0.555 | 1.83E-24 |
| CLSPN | 0.622 | 7.19E-32 |
| CLPTM1L | 0.522 | 2.42E-21 |
| CLIC1 | 0.708 | 9.80E-45 |
| CLEC5A | 0.668 | 3.99E-38 |
| CLEC18C | 0.57 | 6.02E-26 |
| CLEC18B | 0.644 | 8.65E-35 |
| CLCNKB | 0.538 | 8.47E-23 |
| CLCF1 | 0.633 | 2.71E-33 |
| CLASP2 | -0.532 | 3.25E-22 |
| CKS2 | 0.562 | 3.67E-25 |
| CKS1B | 0.587 | 7.95E-28 |
| CKLF | 0.524 | 1.84E-21 |
| CKAP2L | 0.612 | 1.25E-30 |
| CISH | 0.645 | 6.55E-35 |
| CIP2A | 0.538 | 9.73E-23 |
| CHST2 | 0.532 | 3.21E-22 |
| CHRNA9 | 0.634 | 1.70E-33 |
| CHRNA4 | -0.54 | 6.04E-23 |
| CHPF2 | 0.598 | 4.64E-29 |
| CHI3L2 | 0.582 | 2.80E-27 |
| CHI3L1 | 0.725 | 9.16E-48 |
| CHGB | -0.534 | 2.28E-22 |
| CHEK2 | 0.6 | 2.88E-29 |
| CHEK1 | 0.599 | 4.28E-29 |
| CHAF1B | 0.698 | 6.15E-43 |
| CGAS | 0.633 | 2.62E-33 |
| CFI | 0.533 | 2.62E-22 |
| CFH | 0.54 | 6.01E-23 |
| CFAP45 | 0.567 | 1.12E-25 |
| CEP89 | 0.552 | 4.22E-24 |
| CEP55 | 0.631 | 5.18E-33 |
| CEP135 | 0.635 | 1.42E-33 |
| CEP112 | 0.724 | 1.46E-47 |
| CENPW | 0.529 | 6.50E-22 |
| CENPU | 0.614 | 5.62E-31 |
| CENPS | 0.58 | 4.93E-27 |
| CENPN | 0.635 | 1.47E-33 |
| CENPL | 0.642 | 1.42E-34 |
| CENPK | 0.667 | 5.16E-38 |
| CENPI | 0.565 | 1.76E-25 |
| CENPH | 0.534 | 1.93E-22 |
| CENPF | 0.557 | 1.31E-24 |
| CENPE | 0.694 | 2.52E-42 |
| CENPA | 0.688 | 2.92E-41 |
| CECR2 | -0.522 | 2.57E-21 |
| CDS2 | -0.595 | 1.26E-28 |
| CDR2 | 0.611 | 1.59E-30 |
| CDNF | -0.533 | 2.41E-22 |
| CDKN3 | 0.676 | 2.03E-39 |
| CDKN2C | 0.558 | 1.00E-24 |
| CDK2 | 0.618 | 2.27E-31 |
| CDK1 | 0.537 | 1.07E-22 |
| CDHR1 | -0.675 | 2.78E-39 |
| CDH6 | 0.536 | 1.24E-22 |
| CDH20 | -0.594 | 1.32E-28 |
| CDCP1 | 0.588 | 6.58E-28 |
| CDCA8 | 0.672 | 8.06E-39 |
| CDCA7L | 0.55 | 6.38E-24 |
| CDCA2 | 0.668 | 2.99E-38 |
| CDC6 | 0.677 | 1.43E-39 |
| CDC45 | 0.584 | 1.70E-27 |
| CDC42 | 0.574 | 2.53E-26 |
| CDC25C | 0.642 | 1.69E-34 |
| CDC20 | 0.656 | 1.96E-36 |
| CD63 | 0.633 | 2.86E-33 |
| CD58 | 0.696 | 1.41E-42 |
| CD276 | 0.627 | 1.71E-32 |
| CD248 | 0.635 | 1.40E-33 |
| CD164 | 0.542 | 4.02E-23 |
| CD151 | 0.633 | 2.48E-33 |
| CD101 | 0.728 | 2.63E-48 |
| CCZ1 | 0.528 | 7.66E-22 |
| CCT6A | 0.532 | 3.14E-22 |
| CCSER2 | -0.681 | 3.99E-40 |
| CCNYL1 | 0.636 | 9.34E-34 |
| CCNY | -0.591 | 3.43E-28 |
| CCNJL | 0.548 | 8.99E-24 |
| CCNB2 | 0.621 | 8.82E-32 |
| CCNB1 | 0.697 | 8.88E-43 |
| CCNA2 | 0.62 | 1.17E-31 |
| CCER2 | 0.551 | 4.76E-24 |
| CCDC8 | 0.654 | 3.67E-36 |
| CCDC189 | 0.533 | 2.70E-22 |
| CCDC182 | 0.552 | 3.86E-24 |
| CCDC18 | 0.573 | 2.60E-26 |
| CCDC125 | 0.584 | 1.91E-27 |
| CBX7 | -0.57 | 5.81E-26 |
| CBLN1 | -0.603 | 1.20E-29 |
| CAVIN3 | 0.554 | 2.50E-24 |
| CAVIN1 | 0.653 | 4.68E-36 |
| CAV2 | 0.598 | 5.22E-29 |
| CAST | 0.583 | 2.17E-27 |
| CASP8 | 0.661 | 3.56E-37 |
| CASP6 | 0.671 | 1.36E-38 |
| CASP4 | 0.695 | 1.62E-42 |
| CASP3 | 0.616 | 4.11E-31 |
| CASKIN1 | -0.541 | 4.39E-23 |
| CARD16 | 0.638 | 5.25E-34 |
| CAPZA1 | 0.614 | 5.85E-31 |
| CAPN5 | 0.57 | 5.58E-26 |
| CAPG | 0.552 | 4.18E-24 |
| CANT1 | 0.544 | 2.43E-23 |
| CAMSAP3 | -0.565 | 1.94E-25 |
| CALU | 0.653 | 5.61E-36 |
| CALR | 0.549 | 8.42E-24 |
| CALN1 | -0.53 | 4.51E-22 |
| CALD1 | 0.59 | 4.43E-28 |
| CADM2 | -0.57 | 6.20E-26 |
| CACNG2 | -0.539 | 7.62E-23 |
| CABP4 | 0.676 | 1.81E-39 |
| CA3 | 0.735 | 1.32E-49 |
| CA13 | 0.543 | 3.19E-23 |
| C9orf64 | 0.656 | 1.73E-36 |
| C8orf88 | 0.603 | 1.21E-29 |
| C8orf76 | 0.581 | 4.48E-27 |
| C7orf31 | 0.56 | 6.70E-25 |
| C6orf141 | 0.598 | 4.51E-29 |
| C5orf63 | 0.571 | 4.43E-26 |
| C5orf34 | 0.593 | 2.07E-28 |
| C5orf15 | 0.56 | 5.77E-25 |
| C2orf70 | 0.572 | 3.68E-26 |
| C2orf66 | 0.616 | 4.10E-31 |
| C22orf39 | -0.553 | 3.23E-24 |
| C21orf62 | 0.552 | 3.70E-24 |
| C20orf194 | -0.548 | 9.69E-24 |
| C1S | 0.551 | 4.80E-24 |
| C1RL | 0.65 | 1.52E-35 |
| C1R | 0.578 | 7.57E-27 |
| C1QTNF2 | 0.546 | 1.53E-23 |
| C1orf54 | 0.551 | 5.32E-24 |
| C1GALT1C1 | 0.531 | 3.84E-22 |
| C15orf48 | 0.541 | 4.50E-23 |
| C14orf132 | -0.577 | 1.10E-26 |
| C10orf55 | 0.533 | 2.31E-22 |
| BZW1 | 0.589 | 5.26E-28 |
| BUD31 | 0.561 | 4.93E-25 |
| BUB1B | 0.559 | 7.27E-25 |
| BUB1 | 0.613 | 8.31E-31 |
| BTN2A2 | 0.557 | 1.34E-24 |
| BST1 | 0.563 | 3.08E-25 |
| BRIP1 | 0.589 | 5.44E-28 |
| BRCA2 | 0.539 | 7.01E-23 |
| BRCA1 | 0.532 | 3.31E-22 |
| BORCS7 | -0.59 | 3.79E-28 |
| BORA | 0.556 | 1.44E-24 |
| BOLA3 | 0.649 | 2.04E-35 |
| BMP2 | -0.691 | 9.80E-42 |
| BIRC5 | 0.576 | 1.28E-26 |
| BID | -0.538 | 9.32E-23 |
| BICD1 | 0.586 | 1.10E-27 |
| BGN | 0.602 | 1.61E-29 |
| BEX4 | -0.538 | 9.17E-23 |
| BEST4 | 0.622 | 6.11E-32 |
| BDKRB2 | 0.565 | 1.74E-25 |
| BCR | -0.659 | 7.05E-37 |
| BCL7B | 0.583 | 2.45E-27 |
| BCL7A | -0.583 | 2.54E-27 |
| BCL3 | 0.594 | 1.47E-28 |
| BCL2L12 | 0.586 | 1.17E-27 |
| BCL10 | 0.522 | 2.67E-21 |
| BCAT1 | 0.71 | 5.12E-45 |
| BCAP31 | 0.574 | 2.41E-26 |
| BBIP1 | -0.536 | 1.27E-22 |
| BAX | 0.524 | 1.67E-21 |
| BATF3 | 0.558 | 1.03E-24 |
| BAK1 | 0.524 | 1.80E-21 |
| BACE2 | 0.605 | 8.63E-30 |
| B3GNT7 | 0.705 | 3.29E-44 |
| B3GNT5 | 0.658 | 1.04E-36 |
| AURKB | 0.565 | 2.14E-25 |
| AURKA | 0.662 | 2.41E-37 |
| AUNIP | 0.537 | 1.09E-22 |
| ATP9A | -0.601 | 2.34E-29 |
| ATP8A1 | -0.553 | 3.50E-24 |
| ATP6V1G2 | -0.607 | 4.63E-30 |
| ATP5S | -0.583 | 2.42E-27 |
| ATP5MF | 0.572 | 3.97E-26 |
| ATOH8 | -0.671 | 1.22E-38 |
| ATG9B | 0.563 | 3.09E-25 |
| ATG13 | -0.558 | 9.97E-25 |
| ATF5 | 0.562 | 3.98E-25 |
| ATE1 | -0.549 | 7.75E-24 |
| ATAD1 | -0.58 | 5.30E-27 |
| ASPM | 0.628 | 1.10E-32 |
| ASL | 0.572 | 4.02E-26 |
| ASF1B | 0.614 | 6.48E-31 |
| ASCC1 | -0.593 | 1.68E-28 |
| ASB5 | 0.565 | 1.94E-25 |
| ASB13 | -0.689 | 1.79E-41 |
| ARSJ | 0.58 | 4.94E-27 |
| ARSE | 0.54 | 5.89E-23 |
| ARSD | 0.647 | 3.96E-35 |
| ARPP21 | -0.668 | 3.82E-38 |
| ARPC5 | 0.566 | 1.53E-25 |
| ARPC2 | 0.564 | 2.39E-25 |
| ARPC1A | 0.526 | 1.21E-21 |
| ARNTL2 | 0.648 | 2.70E-35 |
| ARMCX4 | -0.583 | 2.28E-27 |
| ARMC9 | 0.608 | 3.28E-30 |
| ARMC10 | 0.551 | 4.94E-24 |
| ARL9 | 0.683 | 1.74E-40 |
| ARL4C | 0.565 | 1.77E-25 |
| ARL3 | -0.62 | 1.25E-31 |
| ARHGAP18 | 0.589 | 4.73E-28 |
| ARHGAP15 | 0.521 | 3.11E-21 |
| ARHGAP12 | -0.581 | 3.94E-27 |
| ARHGAP11A | 0.61 | 2.12E-30 |
| ARFGAP2 | -0.577 | 1.00E-26 |
| ARF4 | 0.527 | 8.55E-22 |
| ARAP3 | 0.718 | 1.87E-46 |
| AQP5 | 0.74 | 1.11E-50 |
| APOL4 | 0.55 | 6.61E-24 |
| APOC2 | 0.538 | 7.88E-23 |
| APOBEC3G | 0.63 | 5.51E-33 |
| APOBEC3F | 0.684 | 1.21E-40 |
| APOBEC3D | 0.637 | 6.84E-34 |
| APOBEC3C | 0.548 | 9.08E-24 |
| APOBEC3B | 0.543 | 3.07E-23 |
| AP2S1 | 0.585 | 1.41E-27 |
| AP1S3 | 0.652 | 6.97E-36 |
| AOX1 | 0.677 | 1.25E-39 |
| ANXA5 | 0.605 | 8.05E-30 |
| ANXA2R | 0.589 | 5.24E-28 |
| ANXA2 | 0.701 | 1.68E-43 |
| ANXA1 | 0.662 | 2.27E-37 |
| ANTXR2 | 0.537 | 1.09E-22 |
| ANKRD53 | 0.638 | 4.89E-34 |
| ANKRD46 | -0.586 | 1.18E-27 |
| ANKRD26 | -0.524 | 1.74E-21 |
| ANKRD16 | -0.58 | 5.40E-27 |
| ANGPTL6 | 0.543 | 2.75E-23 |
| ANGPT2 | 0.535 | 1.52E-22 |
| ANG | 0.591 | 2.91E-28 |
| AMER2 | -0.603 | 1.45E-29 |
| ALPK3 | 0.553 | 2.94E-24 |
| ALG6 | 0.532 | 3.15E-22 |
| ALG3 | 0.535 | 1.68E-22 |
| ALG2 | 0.533 | 2.84E-22 |
| ALDOC | -0.59 | 3.73E-28 |
| ALDH6A1 | -0.542 | 3.57E-23 |
| ALDH5A1 | -0.664 | 1.26E-37 |
| ALDH2 | -0.629 | 9.09E-33 |
| ALCAM | -0.537 | 9.79E-23 |
| AKR1C3 | -0.604 | 1.00E-29 |
| AKAP6 | -0.576 | 1.23E-26 |
| AKAP1 | -0.561 | 5.11E-25 |
| AK2 | 0.532 | 2.86E-22 |
| AFF2 | -0.549 | 8.09E-24 |
| AFAP1L1 | 0.593 | 1.82E-28 |
| AEBP1 | 0.54 | 5.25E-23 |
| ADPRH | 0.602 | 1.96E-29 |
| ADPGK | 0.532 | 3.36E-22 |
| ADM | 0.524 | 1.61E-21 |
| ADHFE1 | -0.638 | 5.15E-34 |
| ADGRE5 | 0.647 | 3.41E-35 |
| ADD3 | -0.569 | 7.18E-26 |
| ADCY2 | -0.546 | 1.47E-23 |
| ADAMTSL4 | 0.606 | 5.39E-30 |
| ADAMTS3 | 0.632 | 3.35E-33 |
| ADAM33 | 0.532 | 3.31E-22 |
| ADAM22 | -0.605 | 8.58E-30 |
| ADAM19 | 0.575 | 1.94E-26 |
| ADAM12 | 0.753 | 2.52E-53 |
| ACVR2B | -0.615 | 4.98E-31 |
| ACTR3 | 0.571 | 4.35E-26 |
| ACTN4 | 0.587 | 7.87E-28 |
| ACTN1 | 0.632 | 3.44E-33 |
| ACTL10 | 0.656 | 1.72E-36 |
| ACOT12 | 0.581 | 4.36E-27 |
| ACBD5 | -0.675 | 2.83E-39 |
| ACADSB | -0.57 | 6.33E-26 |
| ACAA2 | 0.549 | 7.29E-24 |
| ABRACL | 0.641 | 2.44E-34 |
| ABLIM1 | -0.587 | 9.88E-28 |
| ABI1 | -0.652 | 7.86E-36 |
| ABHD6 | -0.626 | 2.21E-32 |
| ABCC3 | 0.711 | 4.24E-45 |
| AARS | -0.529 | 6.09E-22 |
| AAGAB | 0.567 | 1.25E-25 |
